# Supplementary material
Source: PubMed Central journal article supplement (PMC3166447)

# Supplementary Material

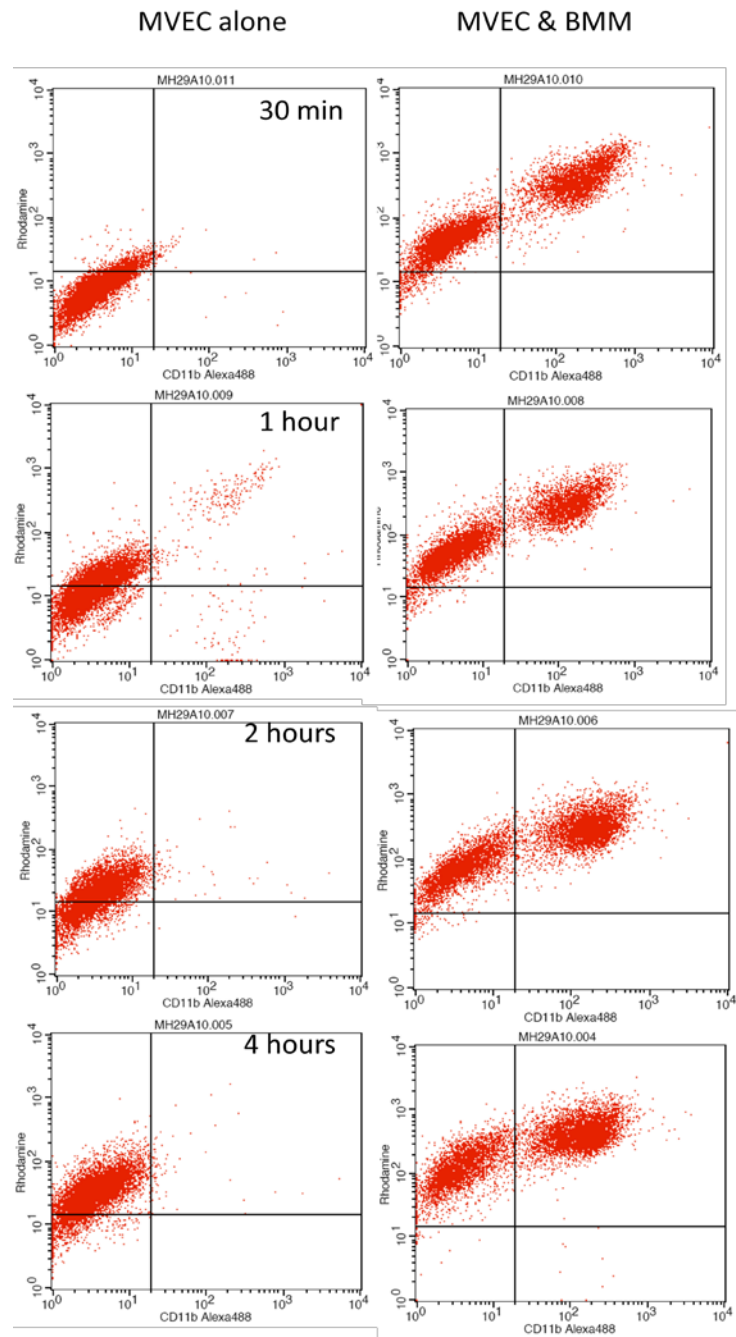

**A**

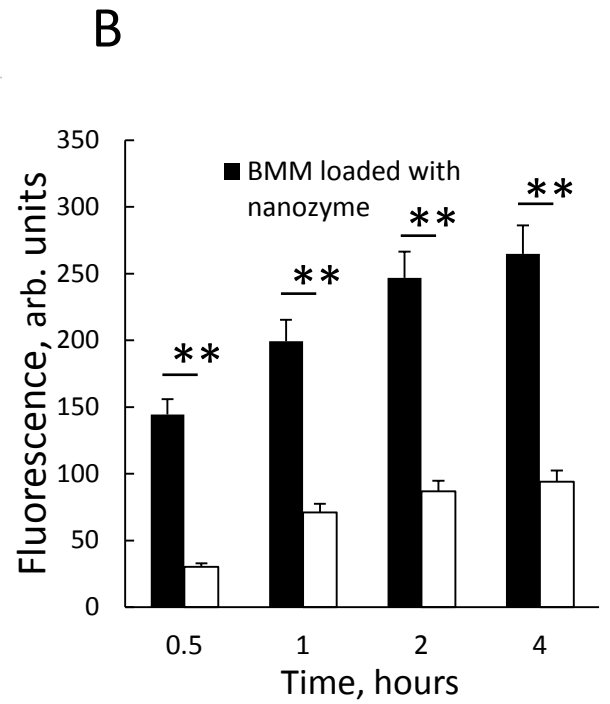

**B**

Supplement: NIHMS293654-supplement-sup_1.pdf [file NIHMS293654-supplement-sup_1.pdf]

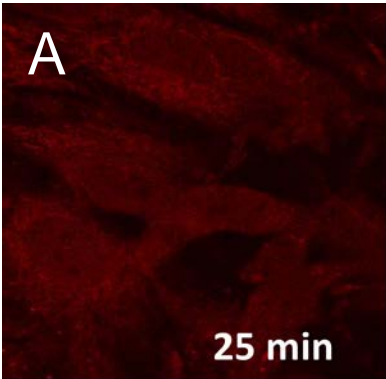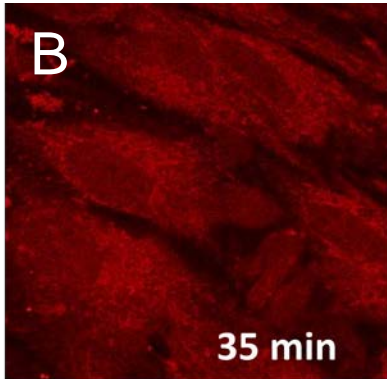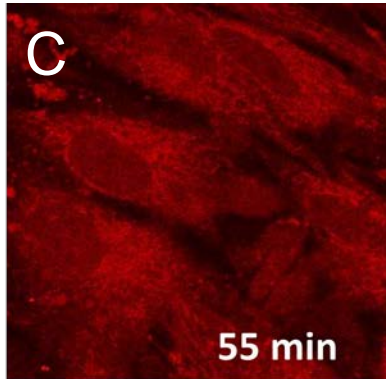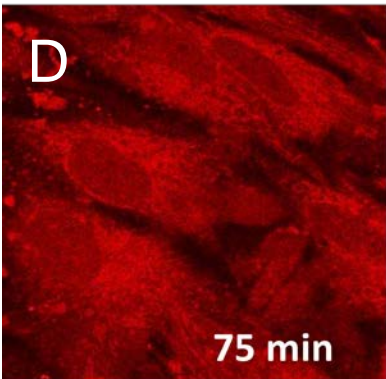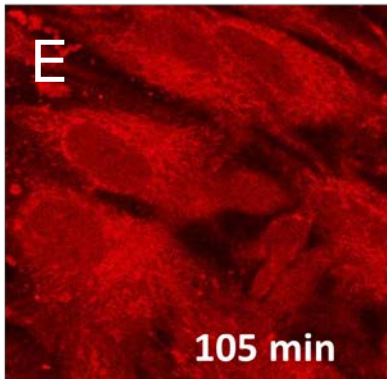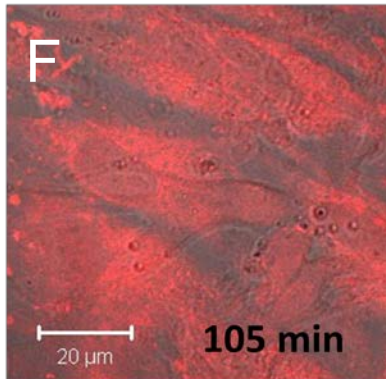

Supplement: NIHMS293654-supplement-sup_2.pdf [file NIHMS293654-supplement-sup_2.pdf]

Nanozyme, BMM

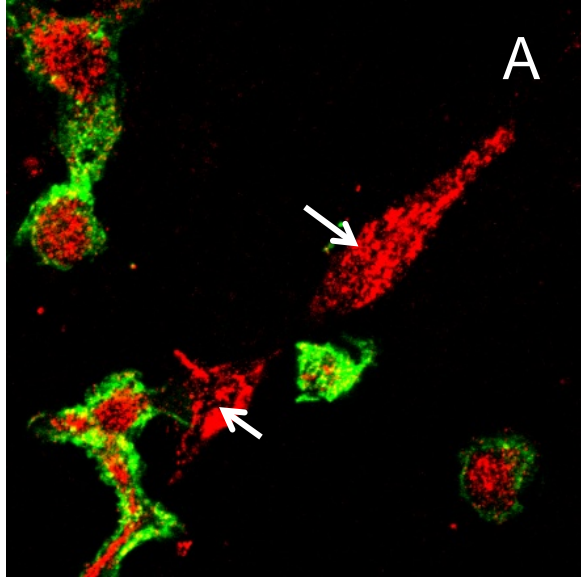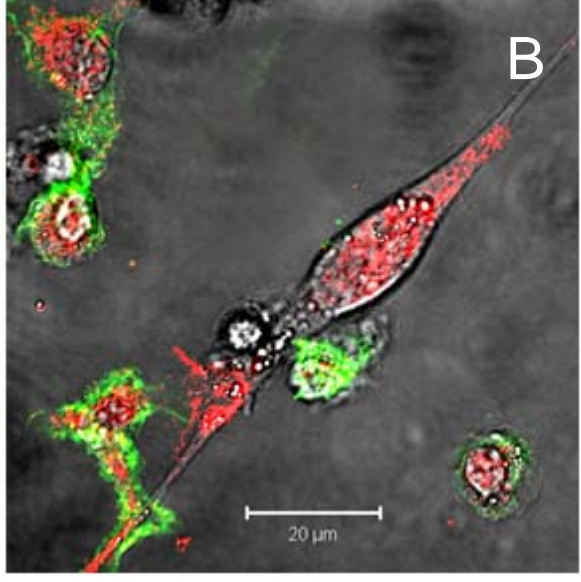

Nanozyme, BMM

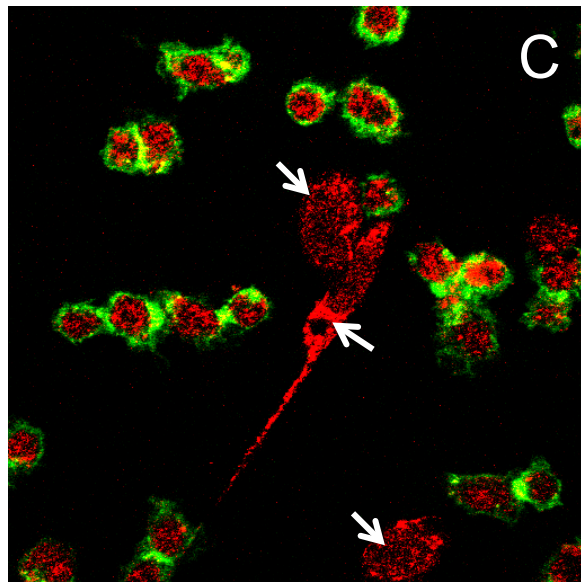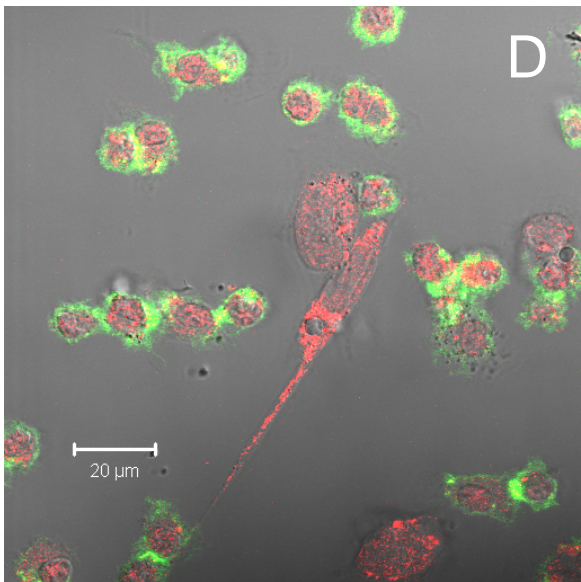

Nanozyme, BMM

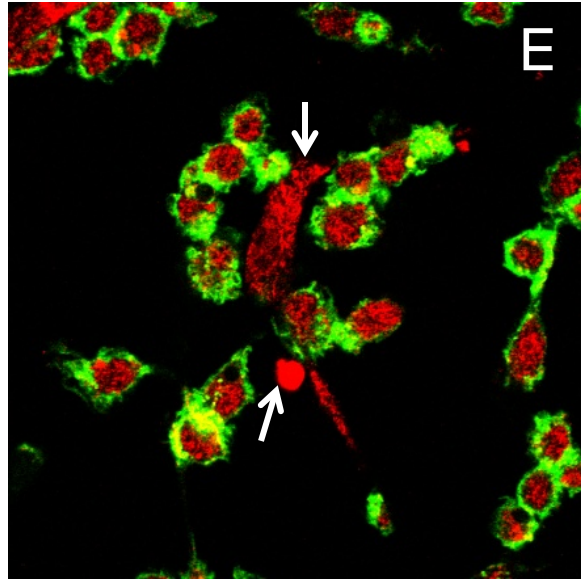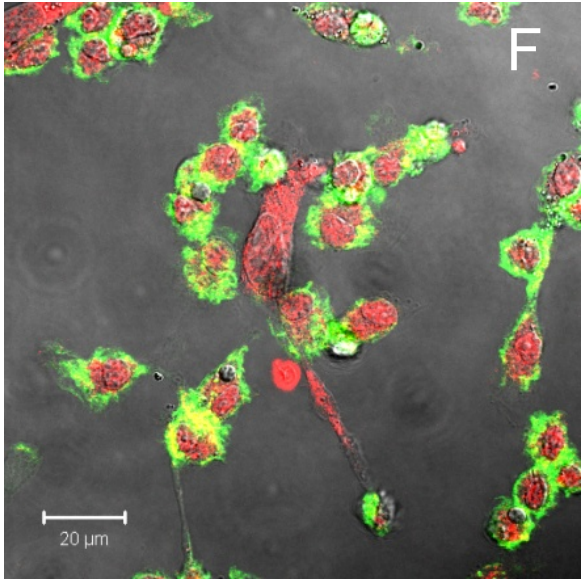

Supplement: NIHMS293654-supplement-sup_3.pdf [file NIHMS293654-supplement-sup_3.pdf]

Nanozyme, BMM

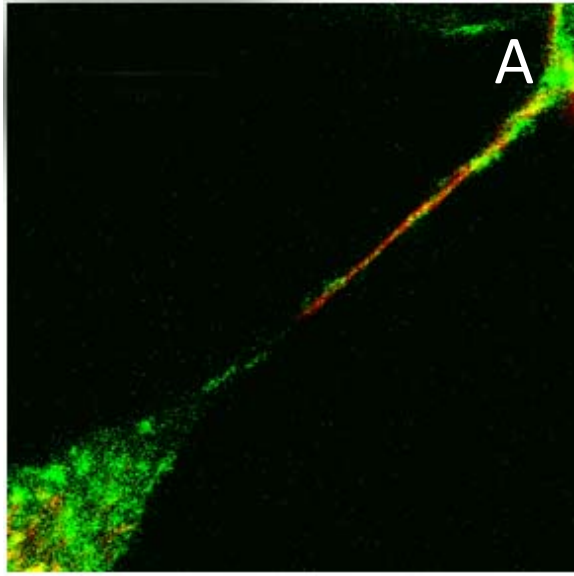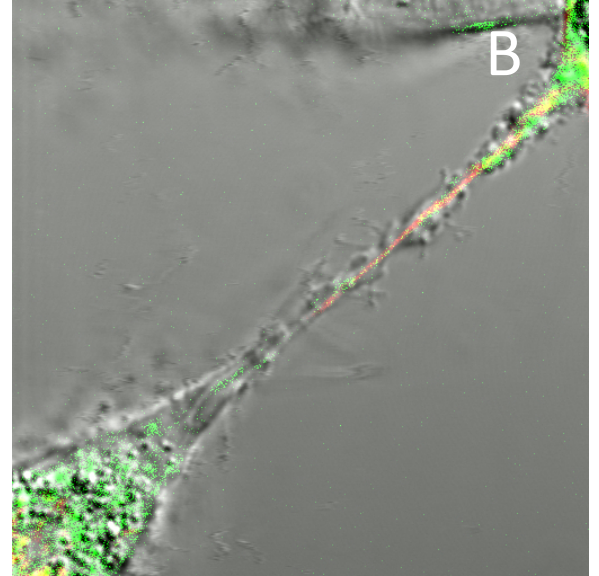

Nanozyme, BMM

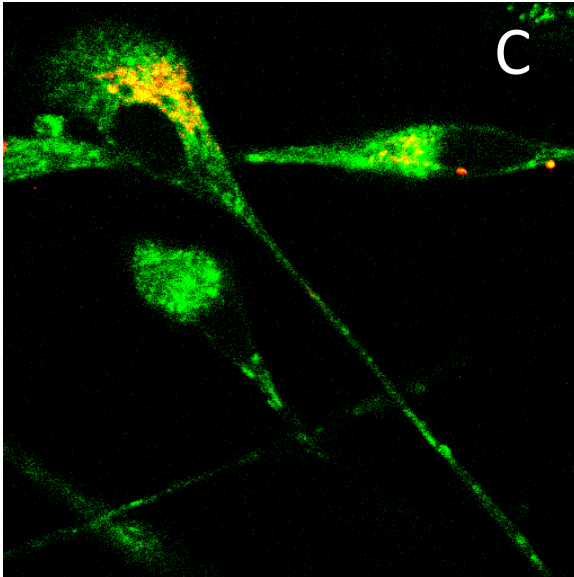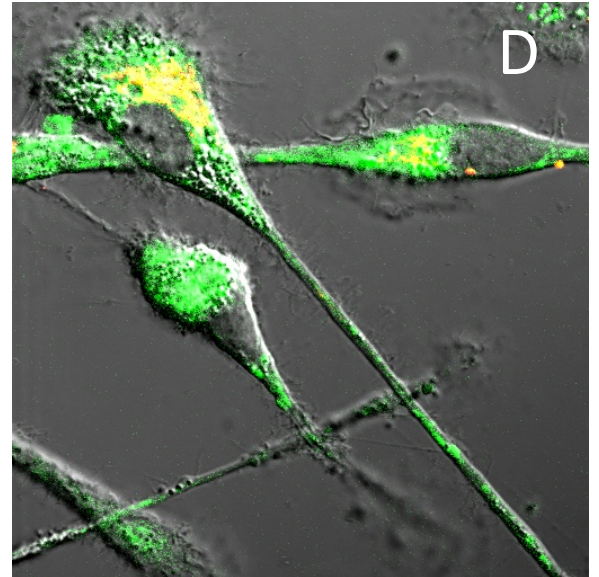

Nanozyme, BMM

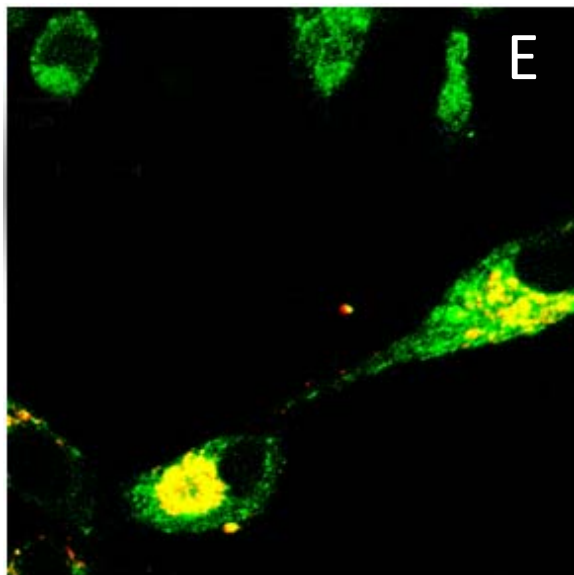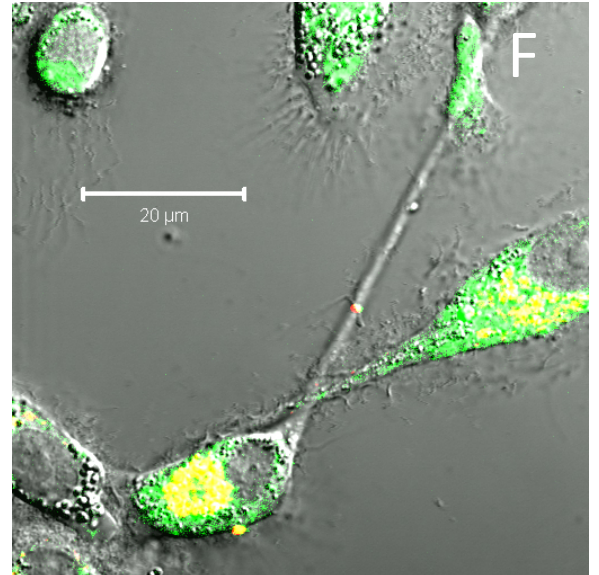

Supplement: NIHMS293654-supplement-sup_4.pdf [file NIHMS293654-supplement-sup_4.pdf]
